# Supplementary material
Source: Springer Nature journal article supplement (https://www.springermedizin.de/resource/supplementary/12943_2010_885_MOESM4_ESM.pdf/9551914)

Relative quantity of methylation (CADM1 gene)

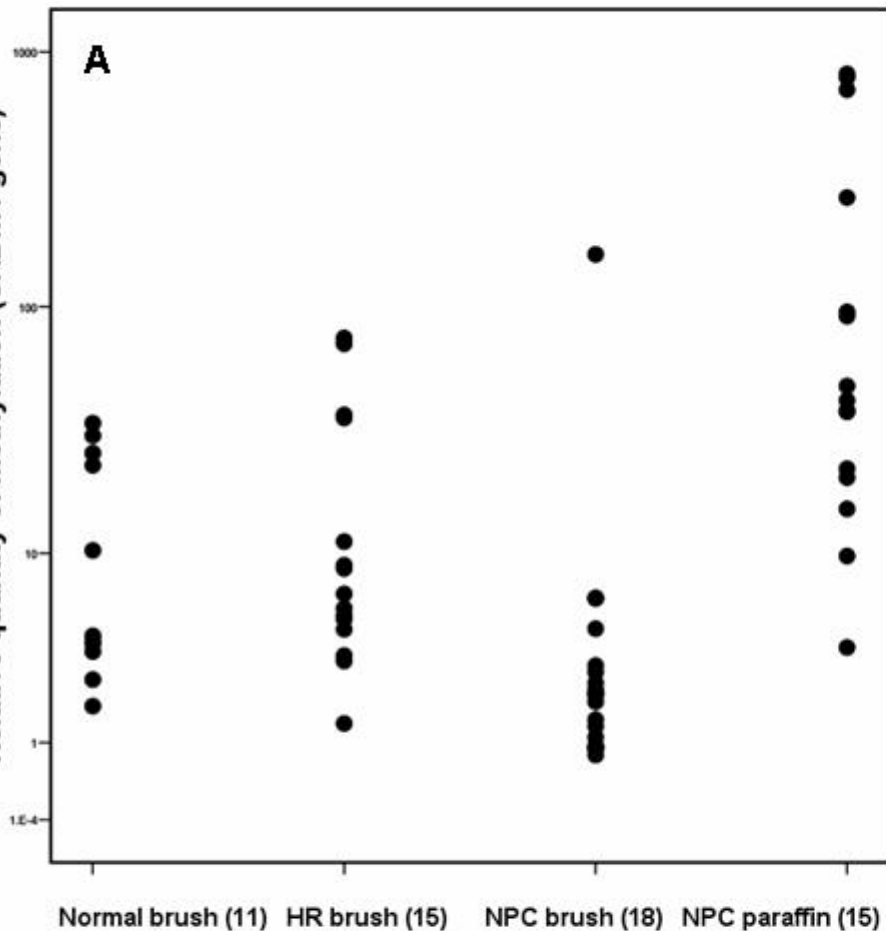

Relative quantity of methylation (MAL gene)

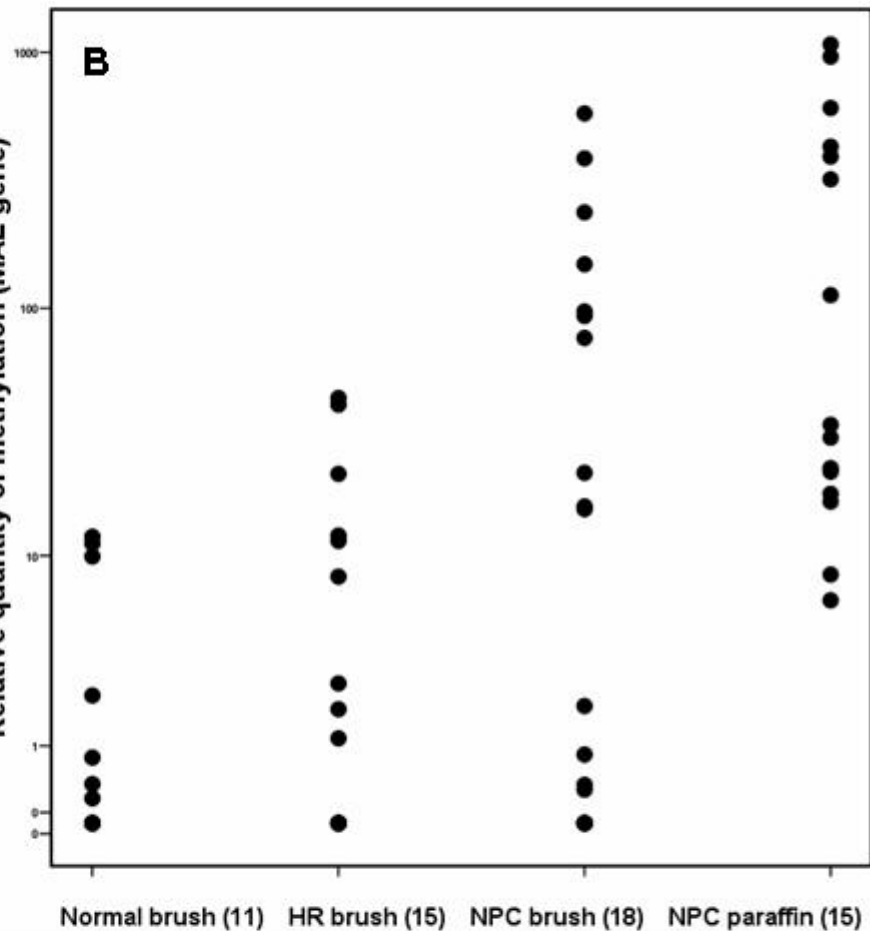

Supplement: MOESM4 [file 9551914]
